# Supplementary material for: In situ architecting amorphous manganese oxide/MXene heterostructure electrode with fast ion transport and structural stability in aqueous Zn–Mn batteries
Source: Royal Society of Chemistry journal article supplement (doi:10.1039/d4ta03223c), 2024-01-01
Supplement: d4ta03223c1.pdf [file d4ta03223c1.pdf]

## Supporting Information

# In Situ Architecting Amorphous Manganese Oxide/MXene Heterostructure Electrode with Fast Ion Transport and Structural Stability in Aqueous Zn-Mn Batteries

*Yang Song<sup>a</sup>, Wang Zhan<sup>a</sup>, Zhihao Wu<sup>a</sup>, Qizhi Chen<sup>c</sup>, Xiaohua Chen<sup>a</sup>, Zuohua Liu<sup>a,b</sup>,*

*Jun Du<sup>a</sup>, Changyuan Tao<sup>a,b,\*</sup>, Qian Zhang<sup>a,\*</sup>*

<sup>a</sup>School of Chemistry and Chemical Engineering, Chongqing University, Chongqing  
400044, China

<sup>b</sup>State Key Laboratory of Coal Mine Disaster Dynamics and Control, Chongqing  
University, Chongqing, 400044, China

<sup>c</sup>Guangxi Huiyuan Manganese Industry Co., Ltd. Laibin City, Guangxi, 546138,  
China

\*Corresponding Author E-mail: taocy@cqu.edu.cn (Changyuan Tao)

\*Corresponding Author E-mail: qianz@cqu.edu.cn (Qian Zhang)

## Supporting Figure Contents

### *S1 Synthesis and materials characterization*

**Fig. S1.** The SEM image and elemental mapping images of a-MnO<sub>2</sub>/Ti<sub>3</sub>C<sub>2</sub>F.

**Fig. S2.** XRD patterns of Ti<sub>3</sub>AlC<sub>2</sub> and Ti<sub>3</sub>C<sub>2</sub>F.

**Fig. S3.** The lattice of (004), (108) and (110) facets of Ti<sub>3</sub>C<sub>2</sub>F.

**Fig. S4.** N<sub>2</sub> adsorption–desorption isotherm and pore size distribution of Ti<sub>3</sub>C<sub>2</sub>F, a-MnO<sub>2</sub>/Ti<sub>3</sub>C<sub>2</sub>F and a-MnO<sub>2</sub>.

**Fig. S5.** EPR spectra of a-MnO<sub>2</sub>/Ti<sub>3</sub>C<sub>2</sub>F and a-MnO<sub>2</sub>.

### *S2 Electrochemical performance and ion diffusion kinetics*

**Fig. S6.** Rate performance of α-MnO<sub>2</sub> and Ti<sub>3</sub>C<sub>2</sub>F.

**Fig. S7.** Cycle performance at 0.3 A g<sup>-1</sup> of α-MnO<sub>2</sub> and Ti<sub>3</sub>C<sub>2</sub>F.

**Fig. S8.** GCD curves at various cycles of a-MnO<sub>2</sub>.

**Fig. S9.** (a) CV curves of a-MnO<sub>2</sub> cathode at various scan rates; (b,c)  $\log(i)$  vs  $\log(v)$  plot of a-MnO<sub>2</sub>/Ti<sub>3</sub>C<sub>2</sub>F and a-MnO<sub>2</sub>; (d) diffusion and capacitive contributions of the a-MnO<sub>2</sub> at 0.3 mV s<sup>-1</sup>; (e) capacitive contribution of the a-MnO<sub>2</sub> at various scan rates.

### *S3 Ions insertion/extraction and reversible conversion mechanism*

**Fig. S10.** (a) Digital photos of the Zn//a-MnO<sub>2</sub>/Ti<sub>3</sub>C<sub>2</sub>F system and (b) a-MnO<sub>2</sub>/Ti<sub>3</sub>C<sub>2</sub>F cathode at different potentials during charging and discharging.

**Fig. S11.** I-t curves of a-MnO<sub>2</sub>/Ti<sub>3</sub>C<sub>2</sub>F and a-MnO<sub>2</sub> from 1.9 V to 1.25 V and then to 0.8 V discharges.

**Fig. S12.** XRD patterns of a-MnO<sub>2</sub> cathode at different potentials during charging and discharging.

**Fig. S13.** SEM-EDS element analysis of the (a) a-MnO<sub>2</sub> and (b) a-MnO<sub>2</sub>/Ti<sub>3</sub>C<sub>2</sub>F electrodes at different charge-discharge states charged to 1.9 V and then charged to 1.25 V.

#### ***S4 Evaluation of electrode materials stabilities***

**Fig. S14.** Photographs of a-MnO<sub>2</sub>/Ti<sub>3</sub>C<sub>2</sub>F and a-MnO<sub>2</sub> cathodes after 500 cycles under a current density of 0.3 A g<sup>-1</sup>.

**Fig. S15.** ICP analysis of dissolved Mn in electrolyte after various cycles for a-MnO<sub>2</sub>/Ti<sub>3</sub>C<sub>2</sub>F and a-MnO<sub>2</sub> cathodes.

**Fig. S16.** Heat absorption curves of a-MnO<sub>2</sub> and a-MnO<sub>2</sub>/Ti<sub>3</sub>C<sub>2</sub>F at different heating rates.

#### ***S5 Density functional theory calculations***

**Fig. S17.** The calculation models of the (a-b) α-MnO<sub>2</sub>, a-MnO<sub>2</sub> and MXene, as well as optimized (c-d) α-MnO<sub>2</sub>/MXene and a-MnO<sub>2</sub>/MXene structures.

**Table S1.** Rate performance of MnO<sub>2</sub> analogue materials reported in literatures.

**Table S2.** a-MnO<sub>2</sub>/Ti<sub>3</sub>C<sub>2</sub>F's GITT corresponding data.

**Table S3.** a-MnO<sub>2</sub>/Ti<sub>3</sub>C<sub>2</sub>F's GITT corresponding data.

**Table S4.**  $E_a$  and  $R^2$  values calculation for the cathode material of a-MnO<sub>2</sub>/Ti<sub>3</sub>C<sub>2</sub>F using three models under different  $\alpha$  values.

**Table S5.**  $E_a$  and  $R^2$  values calculation for the cathode material of a-MnO<sub>2</sub> using three models under different  $\alpha$  values.

*S1 Synthesis and materials characterization*

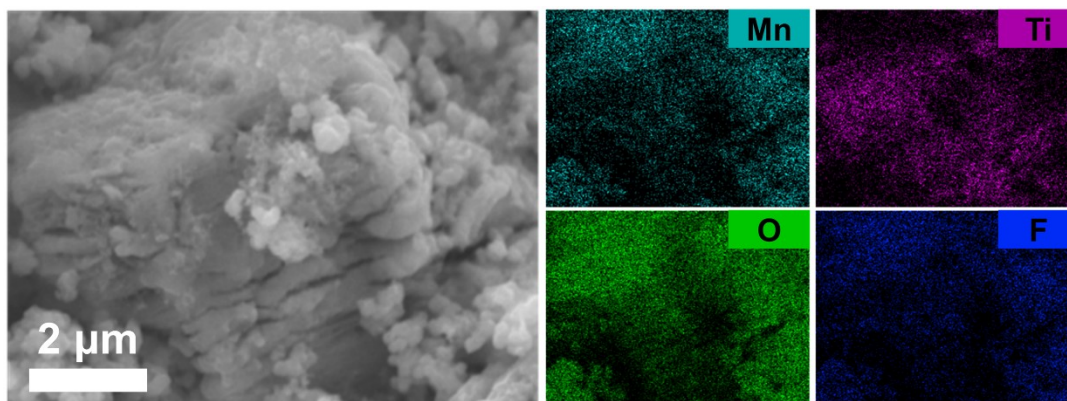

**Figure S1.** The SEM image and elemental mapping images of a-MnO<sub>2</sub>/Ti<sub>3</sub>C<sub>2</sub>F.

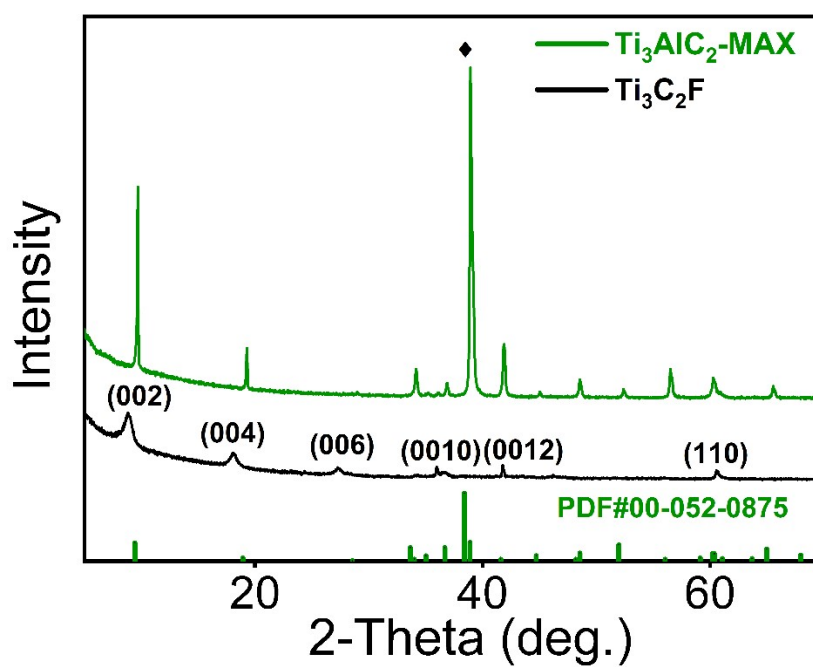

**Figure S2.** XRD patterns of Ti<sub>3</sub>AlC<sub>2</sub> and Ti<sub>3</sub>C<sub>2</sub>F.

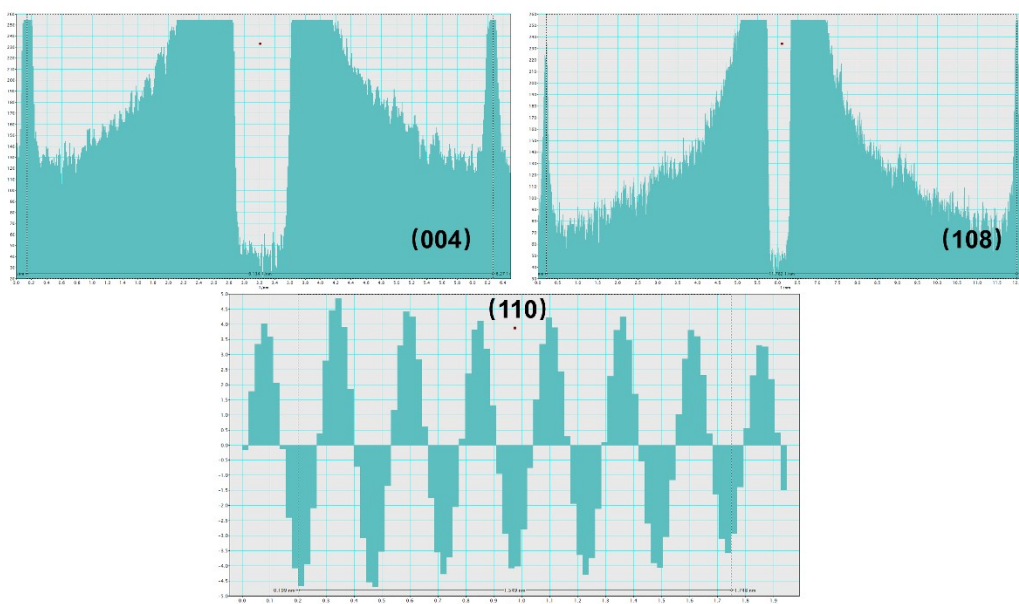

**Figure S3.** The lattice of (004), (108) and (110) facets of  $\text{Ti}_3\text{C}_2\text{F}$ .

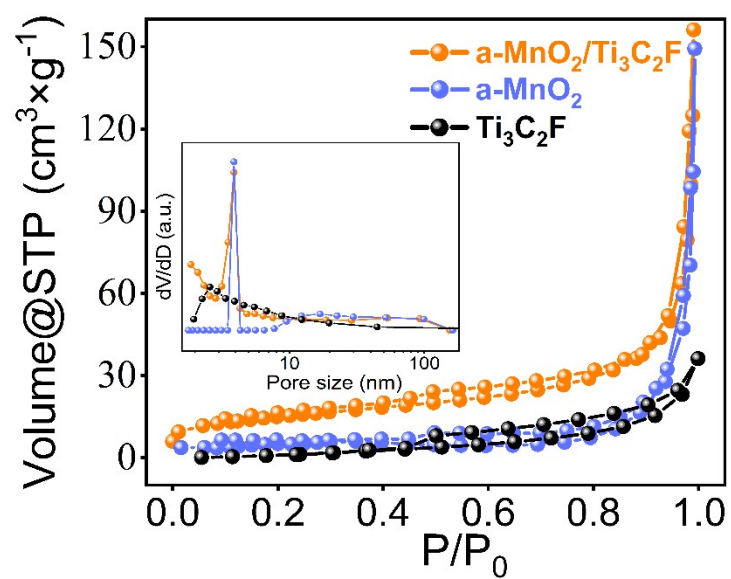

**Figure S4.**  $\text{N}_2$  adsorption–desorption isotherm and pore size distribution of  $\text{Ti}_3\text{C}_2\text{F}$ ,  $\text{a-MnO}_2/\text{Ti}_3\text{C}_2\text{F}$  and  $\text{a-MnO}_2$ .

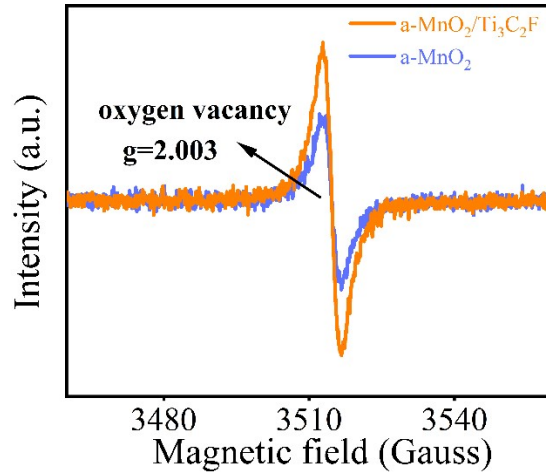

**Figure S5.** EPR spectra of  $\alpha\text{-MnO}_2/\text{Ti}_3\text{C}_2\text{F}$  and  $\alpha\text{-MnO}_2$ .

### *S2 Electrochemical performance and ion diffusion kinetics*

$\alpha\text{-MnO}_2$ , has a tunnel structure of  $2\times 2$  and  $1\times 1$ , which is an ideal positive electrode material due to its good structural stability and high theoretical capacity. Therefore, we established a corresponding battery comparison group to verify the superiority of  $\alpha\text{-MnO}_2/\text{Ti}_3\text{C}_2\text{F}$  and  $\text{Ti}_3\text{C}_2\text{F}$ , as shown in Figure S6-7.

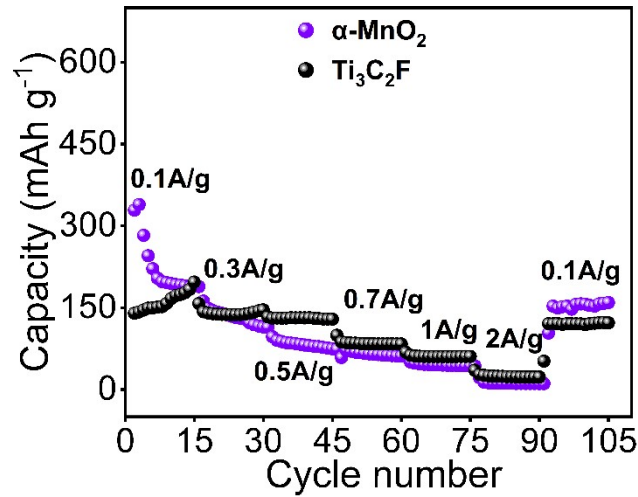

**Figure S6.** Rate performance of  $\alpha\text{-MnO}_2$  and  $\text{Ti}_3\text{C}_2\text{F}$ .

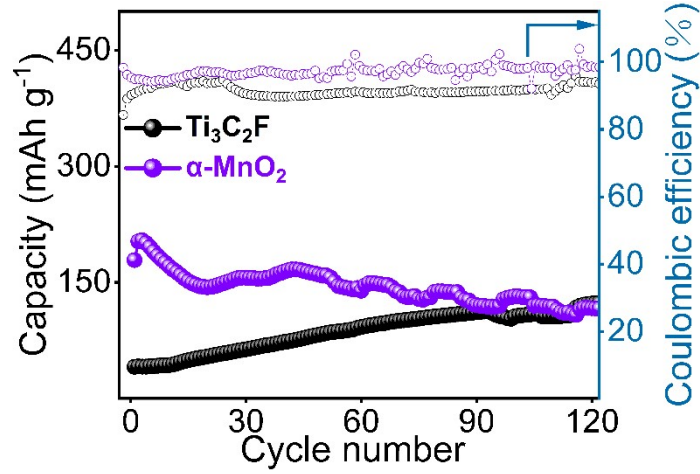

**Figure S7.** Cycle performance at  $0.3 \text{ A g}^{-1}$  of  $\alpha\text{-MnO}_2$  and  $\text{Ti}_3\text{C}_2\text{F}$ .

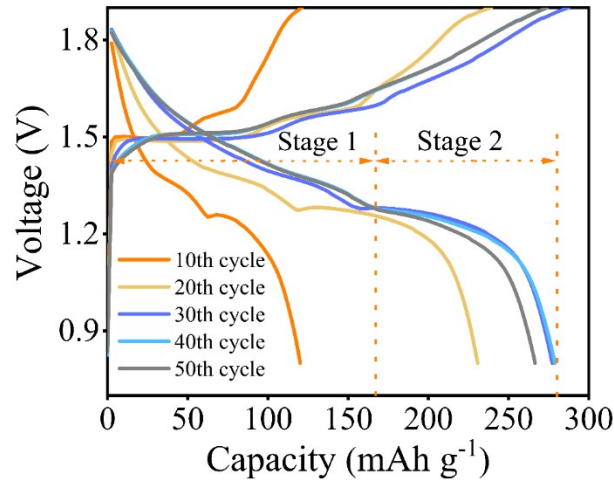

**Figure S8.** GCD curves at various cycles of  $\alpha\text{-MnO}_2$ .

The charge-storage mechanism can be investigated by exploring the relationship between the peak current ( $i$ , mA) and the scan rates ( $v$ ,  $\text{mV s}^{-1}$ ) by Eq.(1)-(2):

$$i = av^b$$

$$\log(i) = b\log(v) + \log(a)$$

Where  $a$  and  $b$  are adjustable parameters. When  $b$  equals to 1, the capacity is fully governed by the capacitive-controlled process; if  $b$  equals to 0.5, it corresponds to a diffusion-controlled process.<sup>1,2</sup>

The respective contribution of capacitive-controlled processes and diffusion-controlled process can be quantitatively estimated through the following Eq.(3)-(4):

$$i(v) = k_1v + k_2v^{1/2}$$

$$i(v)/v^{1/2} = k_1v^{1/2} + k_2$$

Where  $i(v)$ ,  $k_1v$ ,  $k_2v^{1/2}$  and  $v$  refer to the current at a fixed potential, the capacitive-controlled current, the diffusion-controlled current and the scan rate, respectively.<sup>3, 4</sup>

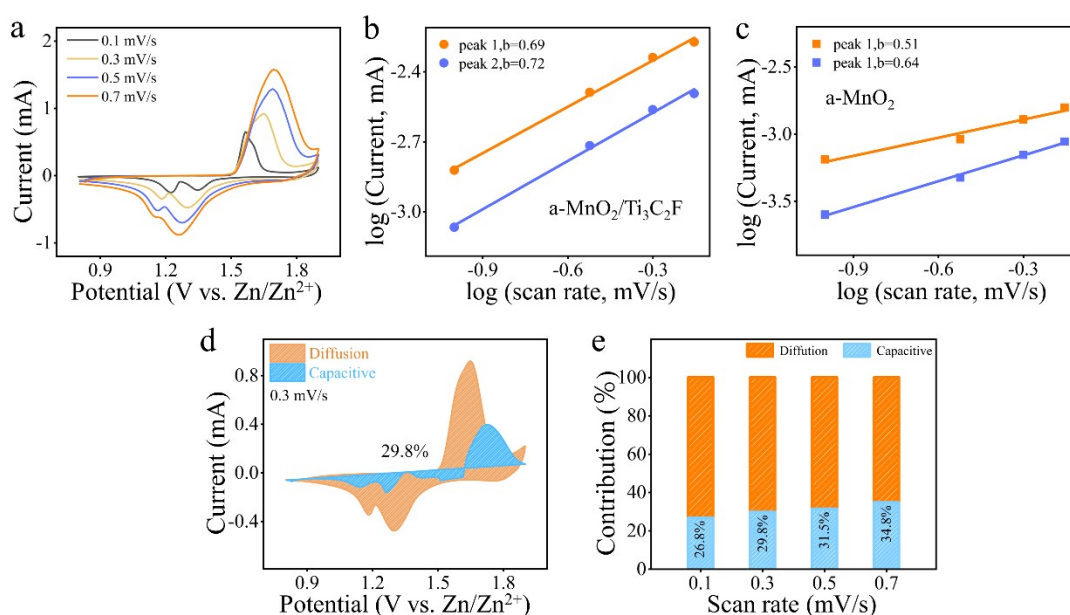

**Figure S9.** (a) CV curves of a-MnO<sub>2</sub> cathode at various scan rates; (b,c) log( $i$ ) vs log( $v$ ) plot of a-MnO<sub>2</sub>/Ti<sub>3</sub>C<sub>2</sub>F and a-MnO<sub>2</sub>; (d) diffusion and capacitive contributions of the a-MnO<sub>2</sub> at 0.3 mV s<sup>-1</sup>; (e) capacitive contribution of the a-MnO<sub>2</sub> at various scan rates.

### S3 Ions insertion/extraction and reversible conversion mechanism

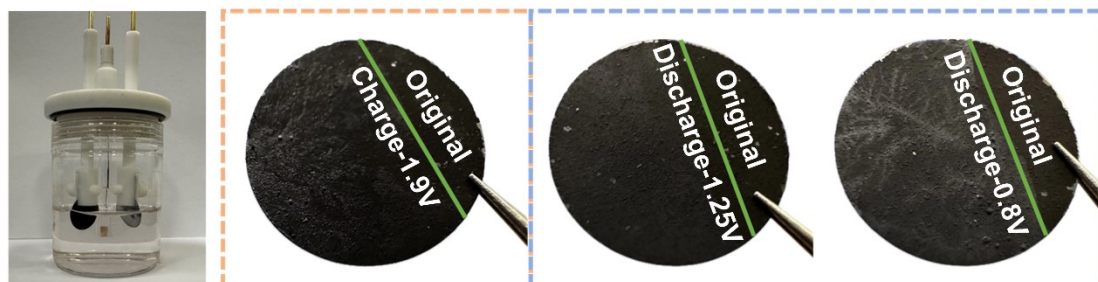

**Figure S10.** (a) Digital photos of the Zn//a-MnO<sub>2</sub>/Ti<sub>3</sub>C<sub>2</sub>F three-electrode system and (b) a-MnO<sub>2</sub>/Ti<sub>3</sub>C<sub>2</sub>F cathode at different potentials during charging and discharging.



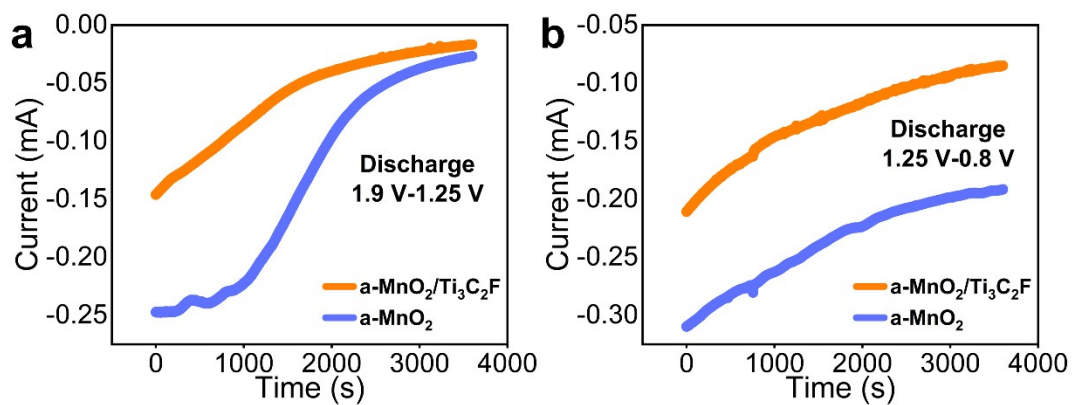

**Figure S11.** I-t curves of a-MnO<sub>2</sub>/Ti<sub>3</sub>C<sub>2</sub>F and a-MnO<sub>2</sub> from 1.9 V to 1.25 V and then to 0.8 V discharges.

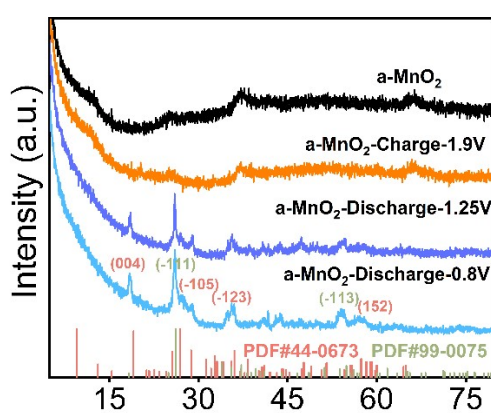

**Figure S12.** XRD patterns of a-MnO<sub>2</sub> cathode at different potentials during charging and discharging.

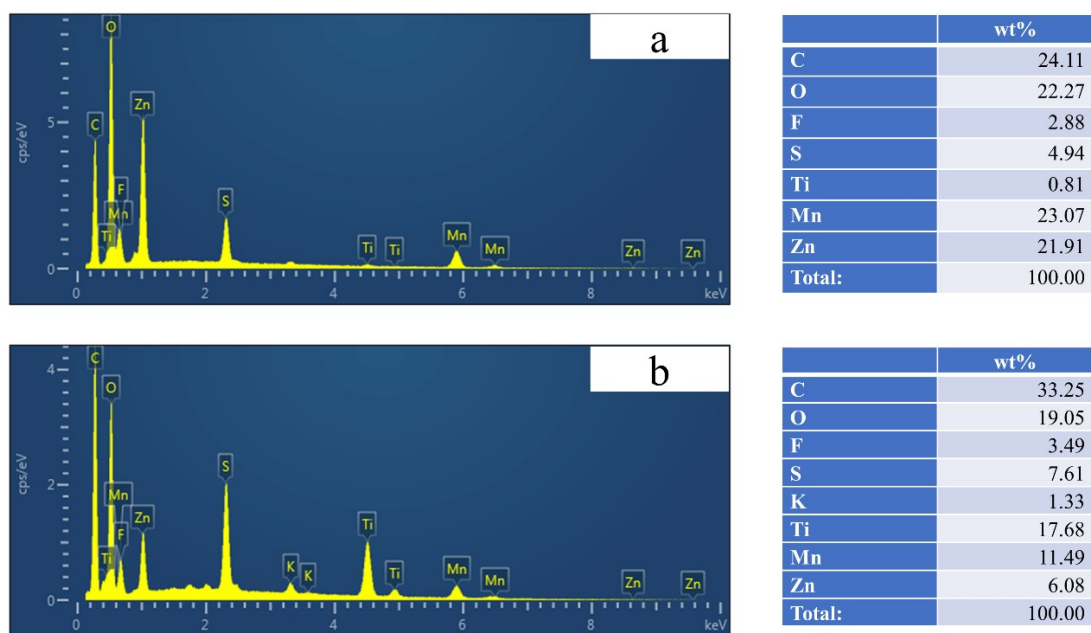

**Figure S13.** SEM-EDS element analysis of the (a) a-MnO<sub>2</sub> and (b) a-MnO<sub>2</sub>/Ti<sub>3</sub>C<sub>2</sub>F electrodes at different charge-discharge states charged to 1.9 V and then charged to 1.25 V.

#### *S4 Evaluation of electrode materials stabilities*

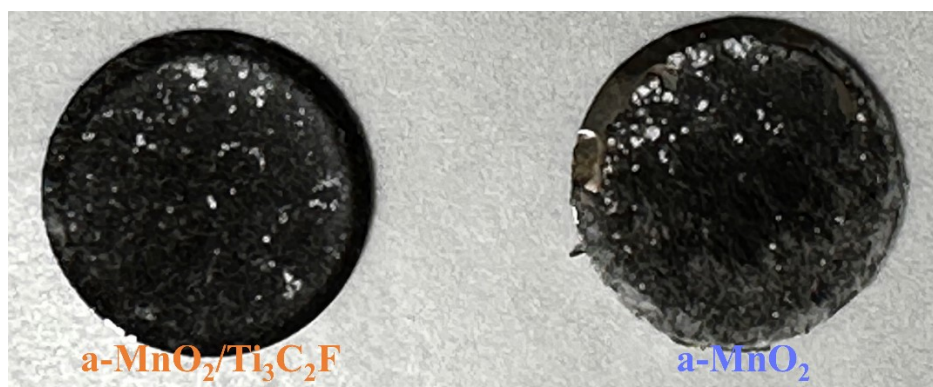

**Figure S14.** Photographs of a-MnO<sub>2</sub>/Ti<sub>3</sub>C<sub>2</sub>F and a-MnO<sub>2</sub> cathodes after 500 cycles under a current density of 0.3 A g<sup>-1</sup>.

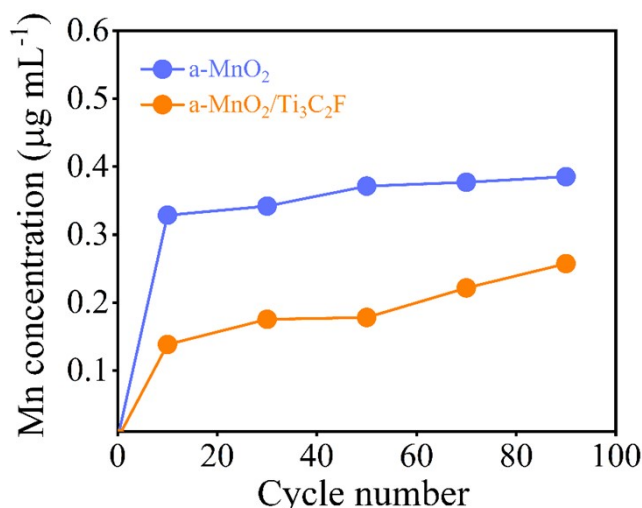

**Figure S15.** ICP analysis of dissolved Mn in electrolyte after various cycles for a-MnO<sub>2</sub>/Ti<sub>3</sub>C<sub>2</sub>F and a-MnO<sub>2</sub> cathodes.

The International Conference on Thermal Analysis and Calorimetry indicates that a reliable thermodynamic model should be based on data obtained under multiple  $\beta$  values. In addition, the equal conversion method should be used to calculate the reaction kinetics. Therefore, in order to study the thermal stability of cathode materials, based on thermodynamic data obtained from DSC, we used Ozawa, Vyazovkin, and KAS models to calculate  $E_a$  at different heating rates  $s$  ( $\beta = 1, 2, 4, 7, \text{ and } 10$  °C/min). Thus, mutual authentication was achieved based on the accuracy of  $E_a$  values.<sup>5</sup>

The thermokinetic parameters of the Ozawa model are calculated using Eq. (1):

$$\ln \beta = \ln \left[ \frac{AE_a}{RG(\alpha)} \right] - 2.315 - 0.4567 \frac{E_a}{RT}$$

where  $\alpha$  is the conversion degree of thermal reaction of electrode materials in batteries,  $A$  is the pre-exponential factor,  $T$  is the reaction temperature (K),  $R$  is the ideal gas constant ( $R = 8.314 \text{ J}/(\text{mol}\cdot\text{K})$ ), and  $G(\alpha)$  is the conversion degree integral function. When  $\alpha$  is fixed,  $G(\alpha)$  is also fixed.

The thermokinetic parameters of the Vyazovkin model are calculated using Eq. (2):

$$-\ln t_{\alpha,t} = \ln \left[ \frac{A}{G(\alpha)} \right] - \frac{E_a}{RT}$$

where  $t_{\alpha, t}$  represents the time required for the electrode material to achieve different thermal conversion rates. The thermokinetic parameters of the KAS model are calculated by Eq. (3):

$$\ln\left(\frac{\beta}{T^2}\right) = \ln\left[\frac{AR}{E_a G(\alpha)}\right] - \frac{E_a}{RT}$$

In order to set a baseline when analyzing the data, we randomly selected 12 conversion degrees ( $\alpha = 0.05, 0.1, 0.2, 0.3, 0.4, 0.5, 0.6, 0.7, 0.8, 0.9, 0.95,$  and  $0.99$ ) are used for thermodynamic analysis.<sup>6</sup>

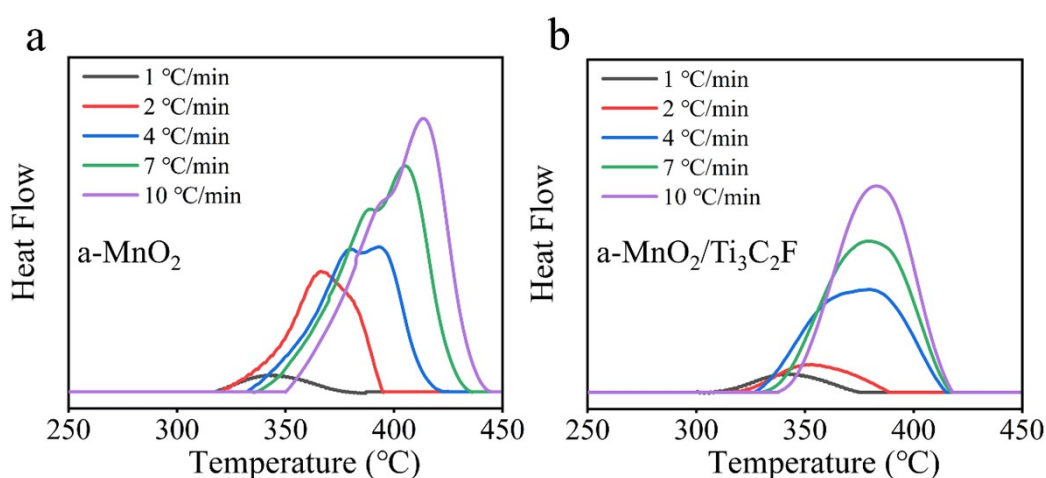

**Figure S16.** Heat absorption curves of a-MnO<sub>2</sub> and a-MnO<sub>2</sub>/Ti<sub>3</sub>C<sub>2</sub>F at different heating rates.

### S5 Density functional theory calculations

Our density functional theory (DFT) calculations<sup>7, 8</sup> were conducted using Vienna *ab initio* simulation package (VASP), employing plane-wave basis sets with the projector augmented-wave method.<sup>9, 10</sup> The exchange-correlation potential was treated using a generalized gradient approximation (GGA) with the Perdew-Burke-Ernzerhof (PBE) parametrization.<sup>11</sup> Additionally, we incorporated the van der Waals correction of Grimme's DFT-D3 model.<sup>12</sup> The energy cutoff was set to 520 eV, and the Brillouin-zone integration was sampled with a  $\Gamma$ -centered Monkhorst-Pack mesh of  $2 \times 2 \times 1$ .<sup>13</sup> Structural relaxations were performed until the maximum force on each atom was less than 0.01 eV/Å, and the energy convergence standard was  $10^{-5}$  eV. Our calculations

utilized density functional theory with an applied Hubbard U (DFT+U) on the Mn (3.9 eV) d-orbitals, allowing for magnetic order with spin polarized calculations.<sup>14</sup> To determine the minimum-energy path and diffusion energy barrier of Zn diffusion along the interfaces, we employed the climbing-image nudged elastic band (CI-NEB) approach.

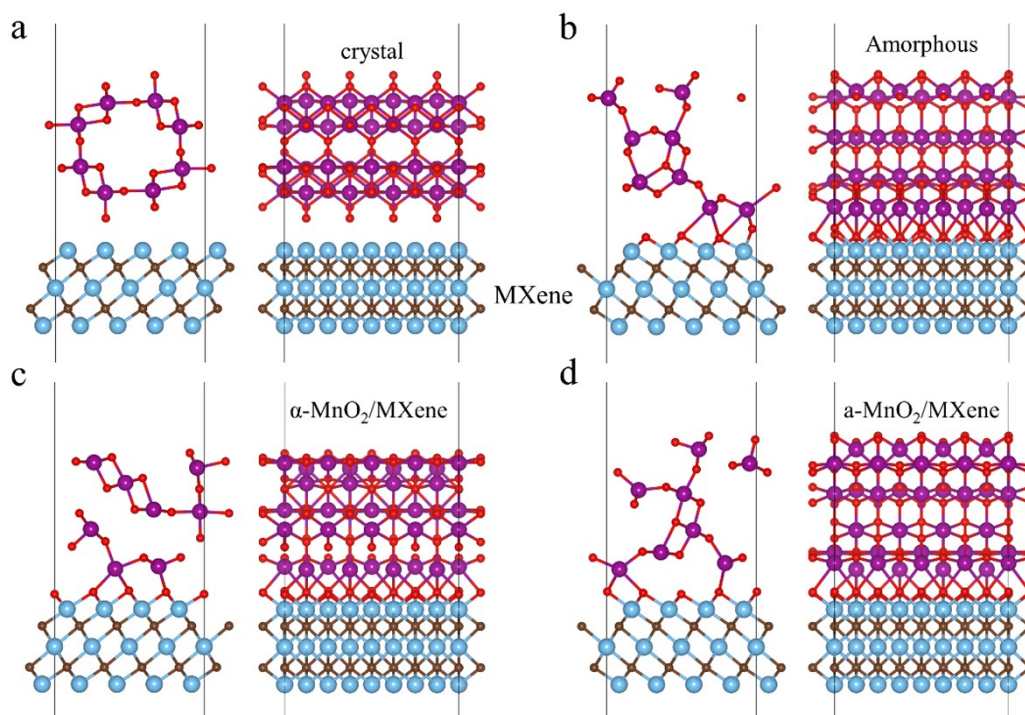

**Figure S17.** The calculation models of the (a-b)  $\alpha$ -MnO<sub>2</sub>, a-MnO<sub>2</sub> and MXene, as well as optimized (c-d)  $\alpha$ -MnO<sub>2</sub>/MXene and a-MnO<sub>2</sub>/MXene structures.

**Table S1** Rate performance of MnO<sub>2</sub> analogue materials reported in literatures.

| <i>Phase information</i>                                         | <i>Rate performance</i>                                    | <i>References</i>                                       |
|------------------------------------------------------------------|------------------------------------------------------------|---------------------------------------------------------|
| $\beta$ -MnO <sub>2</sub>                                        | <b>205 mAh g<sup>-1</sup> at<br/>200 mA g<sup>-1</sup></b> | <b>[15] J. Energy Chem. 56<br/>(2021) 365–37</b>        |
| $\beta$ -MnO <sub>2</sub>                                        | 193 mAh g <sup>-1</sup> at<br>312 mA g <sup>-1</sup>       | <b>[16] Nano Energy 64 (2019)<br/>103942</b>            |
| $\alpha$ -MnO <sub>2</sub>                                       | 96.8 mAh g <sup>-1</sup> at<br>100 mA g <sup>-1</sup>      | <b>[17] Mater. Today Energy 16<br/>(2020) 1003962</b>   |
| layered-type MnO <sub>2</sub>                                    | 146 mAh g <sup>-1</sup> at 250<br>mA g <sup>-1</sup>       | <b>[18] Electrochim. Acta 276<br/>(2018) 1-11</b>       |
| $\alpha$ -MnO <sub>2</sub>                                       | 260 mAh g <sup>-1</sup> at 308<br>mA g <sup>-1</sup>       | <b>[19] Nat. Energy 1 (2016)<br/>16039</b>              |
| $\gamma$ -MnO <sub>2</sub>                                       | <195 mAh g <sup>-1</sup> at<br>100 mA g <sup>-1</sup>      | <b>[20] Nano-Micro Lett. 16<br/>(2024) 109</b>          |
| MON-coated<br>MnO <sub>2</sub>                                   | 209 mAh g <sup>-1</sup> at 200<br>mA g <sup>-1</sup>       | <b>[21] ACS Nano 17 (2023)<br/>5600–560</b>             |
| $\beta$ -MnO <sub>2</sub> @C<br>hybrids                          | < 120 mAh g <sup>-1</sup> at<br>300 mA g <sup>-1</sup>     | <b>[22] J. Alloy. Compd. 827<br/>(2020) 154273</b>      |
| $\beta$ -MnO <sub>2</sub> @SWCNT                                 | ~235 mAh g <sup>-1</sup> at<br>300 mA g <sup>-1</sup>      | <b>[23] Adv. Mater. 34 (2022)<br/>2109872</b>           |
| $\gamma$ -MnO <sub>2</sub> /MXene                                | 287.3 mAh g <sup>-1</sup> at<br>200 mA g <sup>-1</sup>     | <b>[24] J. Mater. Chem. A, 2020,<br/>8, 24635–24644</b> |
| amorphous-<br>MnO <sub>2</sub> /Ti <sub>3</sub> C <sub>2</sub> F | 384 mAh g <sup>-1</sup> at 300<br>mA g <sup>-1</sup>       | <b>This work</b>                                        |

**Table S2.** a-MnO<sub>2</sub>/Ti<sub>3</sub>C<sub>2</sub>F's GITT corresponding data.

| <b>a-MnO<sub>2</sub>/Ti<sub>3</sub>C<sub>2</sub>F</b> |               |                          |              |
|-------------------------------------------------------|---------------|--------------------------|--------------|
| Record (min)                                          | Potential (V) | D (cm <sup>2</sup> /s)   | logD         |
| 92                                                    | 1.5258        | 8.11661×10 <sup>-5</sup> | -4.090625169 |
| 153.5                                                 | 1.6157        | 5.29600×10 <sup>-5</sup> | -4.276051981 |
| 214.5                                                 | 1.6735        | 1.94329×10 <sup>-5</sup> | -4.711460858 |
| 275.5                                                 | 1.5095        | 8.16773×10 <sup>-5</sup> | -4.087898806 |
| 322.5                                                 | 1.4716        | 1.61107×10 <sup>-4</sup> | -3.792885179 |
| 383.5                                                 | 1.3915        | 9.77024×10 <sup>-5</sup> | -4.01009499  |
| 444.5                                                 | 1.3467        | 5.73523×10 <sup>-6</sup> | -5.241449137 |
| 505.5                                                 | 1.3608        | 1.37014×10 <sup>-6</sup> | -5.863235243 |
| 566.5                                                 | 1.3572        | 4.17483×10 <sup>-6</sup> | -5.379360742 |
| 627.5                                                 | 1.3524        | 5.82346×10 <sup>-6</sup> | -5.234818705 |
| 688.5                                                 | 1.3488        | 1.92905×10 <sup>-6</sup> | -5.714655421 |
| 749.5                                                 | 1.3505        | 2.67286×10 <sup>-4</sup> | -3.573022985 |
| Average                                               |               | 6.50304×10 <sup>-5</sup> | -4.664629935 |

**Table S3.** a-MnO<sub>2</sub>'s GITT corresponding data.

| <b>a-MnO<sub>2</sub></b> |               |                          |              |
|--------------------------|---------------|--------------------------|--------------|
| Record (min)             | Potential (V) | D (cm <sup>2</sup> /s)   | logD         |
| 92                       | 1.5352        | 5.29701×10 <sup>-5</sup> | -4.275968955 |
| 153.5                    | 1.6297        | 3.40659×10 <sup>-5</sup> | -4.46767978  |
| 214.5                    | 1.6707        | 4.19719×10 <sup>-6</sup> | -5.377040752 |
| 275.5                    | 1.6875        | 1.55249×10 <sup>-7</sup> | -6.808969925 |
| 322.5                    | 1.6876        | 2.41489×10 <sup>-4</sup> | -3.617102146 |
| 383.5                    | 1.5287        | 1.25656×10 <sup>-4</sup> | -3.900815628 |
| 444.5                    | 1.4333        | 9.61150×10 <sup>-5</sup> | -4.017208673 |
| 505.5                    | 1.3524        | 3.02991×10 <sup>-6</sup> | -5.518570978 |
| 566.5                    | 1.3622        | 2.19753×10 <sup>-8</sup> | -7.658064215 |
| 627.5                    | 1.3430        | 2.56029×10 <sup>-6</sup> | -5.591709162 |
| 688.5                    | 1.3574        | 2.33078×10 <sup>-6</sup> | -5.632499291 |
| 749.5                    | 1.3381        | 2.46099×10 <sup>-6</sup> | -5.608888415 |
| 810.5                    | 1.3507        | 1.54199×10 <sup>-5</sup> | -4.811915636 |
| 871.5                    | 1.3475        | 6.81411×10 <sup>-5</sup> | -4.166591068 |
| Average                  |               | 4.63295×10 <sup>-5</sup> | -5.103787473 |

**Table S4.**  $E_a$  and  $R^2$  values calculation for the cathode material of a-MnO<sub>2</sub>/Ti<sub>3</sub>C<sub>2</sub>F using three models under different  $\alpha$  values.

| $\alpha$ | Ozawa             |       | Vyazovkin         |       | KAS               |       |
|----------|-------------------|-------|-------------------|-------|-------------------|-------|
|          | $E_a$<br>(kJ/mol) | $R^2$ | $E_a$<br>(kJ/mol) | $R^2$ | $E_a$<br>(kJ/mol) | $R^2$ |
| 5        | 187.736           | 0.998 | 160.552           | 0.977 | 187.493           | 0.997 |
| 10       | 185.436           | 0.993 | 158.062           | 0.966 | 185.001           | 0.993 |
| 20       | 181.716           | 0.988 | 154.112           | 0.953 | 180.984           | 0.987 |
| 30       | 177.013           | 0.982 | 149.366           | 0.939 | 175.960           | 0.980 |
| 40       | 174.067           | 0.972 | 146.152           | 0.921 | 172.789           | 0.969 |
| 50       | 169.259           | 0.960 | 141.314           | 0.900 | 167.669           | 0.955 |
| 60       | 167.486           | 0.952 | 139.504           | 0.889 | 165.737           | 0.947 |
| 70       | 166.492           | 0.940 | 138.208           | 0.870 | 164.619           | 0.933 |
| 80       | 164.586           | 0.927 | 136.243           | 0.852 | 162.539           | 0.918 |
| 90       | 164.215           | 0.918 | 135.807           | 0.841 | 162.053           | 0.908 |
| 95       | 163.663           | 0.909 | 135.068           | 0.828 | 161.400           | 0.898 |
| 99       | 162.362           | 0.912 | 133.924           | 0.831 | 159.934           | 0.901 |
| Average  | 172.002           | 0.954 | 144.026           | 0.897 | 170.514           | 0.948 |



**Table S5.**  $E_a$  and  $R^2$  values calculation for the cathode material of a-MnO<sub>2</sub> using three models under different  $\alpha$  values.

| $\alpha$ | Ozawa             |       | Vyazovkin         |       | KAS               |       |
|----------|-------------------|-------|-------------------|-------|-------------------|-------|
|          | $E_a$<br>(kJ/mol) | $R^2$ | $E_a$<br>(kJ/mol) | $R^2$ | $E_a$<br>(kJ/mol) | $R^2$ |
| 5        | 160.048           | 0.997 | 136.091           | 0.990 | 158.224           | 0.996 |
| 10       | 150.532           | 0.995 | 127.321           | 0.988 | 148.133           | 0.995 |
| 20       | 140.219           | 0.988 | 117.810           | 0.979 | 137.178           | 0.987 |
| 30       | 135.191           | 0.989 | 113.004           | 0.976 | 131.801           | 0.987 |
| 40       | 129.872           | 0.990 | 108.112           | 0.977 | 126.128           | 0.988 |
| 50       | 126.754           | 0.992 | 105.235           | 0.979 | 122.777           | 0.990 |
| 60       | 125.754           | 0.992 | 104.119           | 0.975 | 121.656           | 0.991 |
| 70       | 125.999           | 0.992 | 104.251           | 0.973 | 121.847           | 0.991 |
| 80       | 128.362           | 0.992 | 106.391           | 0.973 | 124.259           | 0.991 |
| 90       | 130.349           | 0.993 | 108.177           | 0.973 | 126.259           | 0.992 |
| 95       | 131.499           | 0.996 | 109.117           | 0.973 | 127.391           | 0.995 |
| 99       | 144.943           | 0.988 | 120.847           | 0.953 | 141.363           | 0.986 |
| Average  | 135.793           | 0.992 | 113.372           | 0.975 | 132.251           | 0.990 |

## REFERENCES

1. Huang, J.; Tang, X.; Liu, K.; Fang, G.; He, Z.; Li, Z., Interfacial chemical binding and improved kinetics assisting stable aqueous Zn-MnO<sub>2</sub> batteries. *Materials Today Energy* **2020**, 17.
2. Li, X.; Ji, C.; Shen, J.; Feng, J.; Mi, H.; Xu, Y.; Guo, F.; Yan, X., Amorphous Heterostructure Derived from Divalent Manganese Borate for Ultrastable and Ultrafast Aqueous Zinc Ion Storage. *Adv. Sci.* **2023**, 10.
3. Liu, W.; Su, Q.; Zhu, R.; Shi, W.; Zhang, F.; Du, G.; Zhao, W.; Zhang, M.; Xu, B., Chemical Lithiation-Induced Oxygen Vacancies in MnO<sub>2</sub> at Room Temperature for Aqueous Zinc-Ion Batteries. *ACS Appl. Energy Mater.* **2023**, 6.
4. Chen, Q.; Lou, X.; Yuan, Y.; You, K.; Li, C.; Jiang, C.; Zeng, Y.; Zhou, S.; Zhang, J.; Hou, G.; Lu, J.; Tang, Y., Surface Adsorption and Proton Chemistry of Ultra-Stabilized Aqueous Zinc–Manganese Dioxide Batteries. *Adv. Mater.* **2023**, 35.
5. Zhang, C.-Z.; Jiang, J.-C.; Huang, A.-C.; Tang, Y.; Xie, L.-J.; Zhai, J.; Xing, Z.-X., A novel multifunctional additive strategy improves the cycling stability and thermal stability of SiO/C anode Li-ion batteries. *Process Saf. and Environ. Protect.* **2022**, 164.
6. Wu, Z.-H.; Wu, Y.; Tang, Y.; Jiang, J.-C.; Huang, A.-C., Evaluation of composite flame-retardant electrolyte additives improvement on the safety performance of lithium-ion batteries. *Process Saf. and Environ. Protect.* **2023**, 169.
7. Hohenberg, P.; Kohn, W., Inhomogeneous Electron Gas. *Phys. Rev. B* **1964**, 136.
8. Kohn, W.; Sham, L. J., Self-Consistent Equations Including Exchange and Correlation Effects. *Physical Review* **1965**, 140.
9. Blöchl, P. E., Projector augmented-wave method. *Phys. Rev. B* **1994**, 50.
10. Kresse, G.; Furthmüller, J. Efficient iterative schemes for ab initio total-energy calculations using a plane-wave basis set. *Phys. Rev. B* **1996**, 54.
11. John P. P.; Kieron, B. Matthias Ernzerhof. Generalized Gradient Approximation Made Simple. *Phys. Rev. Lett.* **1996**, 77.
12. Grimme, S.; Antony, J.; Ehrlich, S.; Krieg, H., A consistent and accurate ab initio parametrization of density functional dispersion correction (DFT-D) for the 94 elements H-Pu. *J. Chem. Phys.* **2010**, 132.
13. Monkhorst, H. J.; Pack, J. D., Special points for Brillouin-zone integrations. *Phys. Rev. B* **1976**, 13.
14. Dudarev, S.L.; Botton, G.A.; Savrasov, S.Y.; Humphreys, C.J. Electron-energy-loss spectra and the structural stability of nickel oxide: An LSDA1U study. *Phys. Rev. Lett.* **1998**, 57.
15. Liu, W.; Zhang, X.; Huang, Y.; Jiang, B.; Chang, Z.; Xu, C.; Kang, F.,  $\beta$ -MnO<sub>2</sub> with proton conversion mechanism in rechargeable zinc ion battery. *J. Energy Chem.* **2021**, 56.
16. Liu, M.; Zhao, Q.; Liu, H.; Yang, J.; Chen, X.; Yang, L.; Cui, Y.; Huang, W.; Zhao, W.; Song, A.; Wang, Y.; Ding, S.; Song, Y.; Qian, G.; Chen, H.; Pan, F., Tuning phase evolution of  $\beta$ -MnO<sub>2</sub> during microwave hydrothermal synthesis for high-performance aqueous Zn ion battery. *Nano Energy* **2019**, 64.
17. Guo, X.; Zhou, J.; Bai, C.; Li, X.; Fang, G.; Liang, S., Zn/MnO<sub>2</sub> battery chemistry with dissolution-deposition mechanism. *Mater. Today Energy* **2020**, 16.

18. Muhammad H. A.; Saiful I.; Dimas Y. P.; Vinod M.; Sungjin K.; Jeonggeun J.; Seokhun K.; Yang-Kook S.; Kwangho K.; Jaekook K., Structural transformation and electrochemical study of layered MnO<sub>2</sub> in rechargeable aqueous zinc-ion battery, *Electrochim. Acta* **2018**, 276.
19. Pan, H.; Shao, Y.; Yan, P.; Cheng, Y.; Han, K. S.; Nie, Z.; Wang, C.; Yang, J.; Li, X.; Bhattacharya, P.; et al., Reversible aqueous zinc/manganese oxide energy storage from conversion reactions, *Nature Energy* **2016**, 1.
20. Lv, W.; Shen, Z.; Li, X.; Meng, J.; Yang, W.; Ding, F.; Ju, X.; Ye, F.; Li, Y.; Lyu, X.; et al., Discovering Cathodic Biocompatibility for Aqueous Zn–MnO<sub>2</sub> Battery: An Integrating Biomass Carbon Strategy, *Nano-Micro Lett.* **2024**, 16.
21. Zuo, Y.; Meng, T.; Tian, H.; Ling, L.; Zhang, H.; Zhang, H.; Sun, X.; Cai, S., Enhanced H<sup>+</sup> Storage of a MnO<sub>2</sub> Cathode via a MnO<sub>2</sub> Nanolayer Interphase Transformed from Manganese Phosphate, *ACS Nano* **2023**, 17.
22. Jiang, W.; Xu, X.; Liu, Y.; Tan, L.; Zhou, F.; Xu, Z.; Hu, R., Facile plasma treated β-MnO<sub>2</sub>@C hybrids for durable cycling cathodes in aqueous Zn-ion batteries, *J. Alloys Compd.* **2020**, 827.
23. He, P.; Huang, J., Chemical Passivation Stabilizes Zn Anode, *Adv. Mater.* **2022**, 34.
24. Shi, M.; Wang, B.; Chen, C.; Lang, J.; Yan, C.; Yan, X., 3D high-density MXene@MnO<sub>2</sub> microflowers for advanced aqueous zinc-ion batteries, *J. Mater. Chem. A* **2020**, 8.
